# Supplementary material for: Low-dose Btk inhibitors: an ‘aspirin’ of tomorrow?
Source: PubMed Central journal article supplement — Haematologica. 2021 Jan 1;106(1):2–4. doi: 10.3324/haematol.2020.265173 (PMC7776254; doi:10.3324/haematol.2020.265173), 2021-01-01
Supplement: 2020_265173-Disclosure.pdf [file 2020_265173-Disclosure.pdf]

Haematologica  
HAEMATOL/2020/265173  
Version 1

Low dose Btk inhibitors: an 'aspirin' of tomorrow?

Bernard Payrastre and Agnès Ribes

Disclosures: 'none'

Contributions: BP and AR wrote the manuscript and made the figure
